# Supplementary material
Source: PubMed Central journal article supplement (PMC4592092)
Supplement: ejhg2014299x18.pdf [file ejhg2014299x18.pdf]

**Supplementary Table 7. Genomic regions of ROH hotspots on autosomes in ND populations**

| Chr  | Genomic Region (bp) |           |          |          | ROH Frequency |       |       | Identified in previous studies |
|------|---------------------|-----------|----------|----------|---------------|-------|-------|--------------------------------|
|      | Start Pos           | End Pos   | Size(bp) | No. SNPs | Mean          | Min   | Max   |                                |
| chr1 | 217858445           | 218136948 | 278504   | 57       | 0.231         | 0.100 | 0.455 |                                |
| chr1 | 234751417           | 234963129 | 211713   | 73       | 0.249         | 0.111 | 0.429 |                                |
| chr1 | 65823585            | 65971811  | 148227   | 54       | 0.250         | 0.100 | 0.400 |                                |
| chr1 | 189706700           | 190022535 | 315836   | 83       | 0.271         | 0.130 | 0.546 |                                |
| chr1 | 194769459           | 195143502 | 374044   | 72       | 0.295         | 0.125 | 0.500 |                                |
| chr1 | 192200338           | 192587114 | 386777   | 73       | 0.297         | 0.100 | 0.600 |                                |
| chr1 | 102875719           | 103530366 | 654648   | 142      | 0.316         | 0.133 | 0.615 | a,b                            |
| chr1 | 62643671            | 63039308  | 395638   | 105      | 0.450         | 0.100 | 0.833 |                                |
| chr2 | 115590935           | 116112528 | 521594   | 76       | 0.225         | 0.100 | 0.600 |                                |
| chr2 | 152195028           | 153009787 | 814760   | 102      | 0.227         | 0.100 | 0.455 |                                |
| chr2 | 43503284            | 43619614  | 116331   | 81       | 0.238         | 0.100 | 0.444 |                                |
| chr2 | 196169696           | 196779944 | 610249   | 57       | 0.245         | 0.111 | 0.455 | a                              |
| chr2 | 31446399            | 31824105  | 377707   | 65       | 0.257         | 0.100 | 0.500 |                                |
| chr2 | 102250050           | 102578469 | 328420   | 133      | 0.295         | 0.100 | 0.600 |                                |
| chr2 | 205867969           | 205970815 | 102847   | 83       | 0.297         | 0.111 | 0.667 |                                |
| chr2 | 179111996           | 179328203 | 216208   | 51       | 0.307         | 0.125 | 0.667 |                                |
| chr2 | 21085700            | 21305109  | 219410   | 86       | 0.324         | 0.100 | 0.467 |                                |
| chr2 | 203244060           | 204163405 | 919346   | 81       | 0.347         | 0.100 | 0.600 |                                |
| chr2 | 205852935           | 206054450 | 201516   | 108      | 0.378         | 0.100 | 0.714 |                                |
| chr2 | 227363592           | 227645855 | 282264   | 93       | 0.382         | 0.100 | 0.600 |                                |
| chr2 | 198115422           | 198671076 | 555655   | 102      | 0.571         | 0.143 | 0.818 |                                |
| chr3 | 95981029            | 96539106  | 558078   | 62       | 0.186         | 0.111 | 0.273 |                                |
| chr3 | 80493393            | 81248451  | 755059   | 75       | 0.204         | 0.100 | 0.364 | a                              |
| chr3 | 56008087            | 56534284  | 526198   | 84       | 0.213         | 0.100 | 0.500 |                                |
| chr3 | 118808667           | 118967152 | 158486   | 57       | 0.225         | 0.100 | 0.364 |                                |
| chr3 | 146501568           | 146654665 | 153098   | 55       | 0.229         | 0.100 | 0.455 |                                |
| chr3 | 156643719           | 157109119 | 465401   | 69       | 0.259         | 0.100 | 0.417 |                                |
| chr3 | 157468033           | 157633355 | 165323   | 68       | 0.262         | 0.100 | 0.429 |                                |
| chr3 | 40058933            | 40655323  | 596391   | 87       | 0.264         | 0.100 | 0.700 | a                              |
| chr3 | 100521612           | 100868388 | 346777   | 80       | 0.271         | 0.115 | 0.636 |                                |
| chr3 | 87079948            | 87548995  | 469048   | 93       | 0.280         | 0.125 | 0.500 |                                |
| chr3 | 21272699            | 21425617  | 152919   | 60       | 0.290         | 0.125 | 0.600 |                                |
| chr3 | 135624538           | 135878289 | 253752   | 101      | 0.373         | 0.100 | 0.692 |                                |
| chr4 | 18709017            | 19159035  | 450019   | 67       | 0.221         | 0.100 | 0.400 |                                |
| chr4 | 151316842           | 151798730 | 481889   | 54       | 0.234         | 0.125 | 0.500 | a                              |
| chr4 | 9511328             | 9931461   | 420134   | 94       | 0.239         | 0.100 | 0.429 |                                |
| chr4 | 123224984           | 123717147 | 492164   | 67       | 0.258         | 0.143 | 0.400 |                                |
| chr4 | 60641999            | 60960571  | 318573   | 55       | 0.260         | 0.100 | 0.455 |                                |
| chr4 | 34023487            | 34440383  | 416897   | 63       | 0.270         | 0.143 | 0.636 | a,b                            |
| chr4 | 123883654           | 124505928 | 622275   | 85       | 0.276         | 0.100 | 0.500 |                                |
| chr4 | 110878516           | 111167057 | 288542   | 76       | 0.283         | 0.100 | 0.615 |                                |
| chr4 | 111853210           | 111956331 | 103122   | 60       | 0.285         | 0.100 | 0.800 |                                |
| chr4 | 73028426            | 73531330  | 502905   | 99       | 0.306         | 0.100 | 0.636 | a                              |
| chr4 | 82339412            | 82557755  | 218344   | 66       | 0.359         | 0.154 | 0.800 | a                              |
| chr4 | 145733911           | 146246884 | 512974   | 80       | 0.429         | 0.100 | 0.600 |                                |
| chr4 | 17390030            | 17785521  | 395492   | 113      | 0.463         | 0.125 | 1.000 |                                |
| chr5 | 151866059           | 152320609 | 454551   | 63       | 0.192         | 0.100 | 0.400 |                                |
| chr5 | 25219044            | 25554215  | 335172   | 57       | 0.207         | 0.100 | 0.429 |                                |
| chr5 | 111159013           | 111488226 | 329214   | 63       | 0.245         | 0.100 | 0.500 |                                |
| chr5 | 131505933           | 131960652 | 454720   | 73       | 0.264         | 0.115 | 0.600 | a                              |
| chr5 | 40340893            | 40552060  | 211168   | 82       | 0.277         | 0.100 | 0.500 |                                |
| chr5 | 111531548           | 111687897 | 156350   | 59       | 0.281         | 0.136 | 0.539 |                                |
| chr5 | 74379525            | 75083651  | 704127   | 91       | 0.292         | 0.100 | 0.563 |                                |
| chr5 | 42110156            | 42471866  | 361711   | 58       | 0.307         | 0.111 | 0.667 | a                              |
| chr5 | 150068312           | 150313891 | 245580   | 65       | 0.346         | 0.100 | 0.800 |                                |
| chr6 | 62685906            | 63272102  | 586197   | 76       | 0.188         | 0.100 | 0.393 | a                              |
| chr6 | 31254418            | 31316712  | 62295    | 95       | 0.205         | 0.100 | 0.500 |                                |
| chr6 | 119549906           | 119926291 | 376386   | 63       | 0.217         | 0.111 | 0.400 |                                |
| chr6 | 29758110            | 29799753  | 41644    | 81       | 0.231         | 0.143 | 0.364 |                                |
| chr6 | 31326814            | 31343725  | 16912    | 69       | 0.234         | 0.100 | 0.429 |                                |
| chr6 | 85291123            | 85699611  | 408489   | 70       | 0.237         | 0.100 | 0.400 |                                |
| chr6 | 31048484            | 31107682  | 59199    | 132      | 0.241         | 0.100 | 0.500 |                                |
| chr6 | 51707528            | 51860841  | 153314   | 63       | 0.245         | 0.111 | 0.818 |                                |
| chr6 | 115488672           | 116072501 | 583830   | 56       | 0.249         | 0.136 | 0.500 |                                |
| chr6 | 30053249            | 30088219  | 34971    | 93       | 0.249         | 0.167 | 0.500 |                                |
| chr6 | 38333644            | 38577196  | 243553   | 65       | 0.250         | 0.115 | 0.546 |                                |
| chr6 | 130376102           | 130539790 | 163689   | 68       | 0.254         | 0.125 | 0.600 |                                |
| chr6 | 75169971            | 75454075  | 284105   | 54       | 0.260         | 0.100 | 0.556 | a                              |
| chr6 | 32680679            | 32690470  | 9792     | 103      | 0.273         | 0.100 | 0.500 |                                |
| chr6 | 127514317           | 127820538 | 306222   | 78       | 0.274         | 0.107 | 0.462 |                                |
| chr6 | 135798715           | 136029985 | 231271   | 50       | 0.274         | 0.111 | 0.455 |                                |
| chr6 | 29838621            | 29907725  | 69105    | 177      | 0.276         | 0.167 | 0.400 |                                |
| chr6 | 81439505            | 81904044  | 464540   | 65       | 0.281         | 0.100 | 0.700 |                                |
| chr6 | 44747701            | 45489562  | 741862   | 250      | 0.284         | 0.100 | 0.563 |                                |
| chr6 | 32694626            | 32704544  | 9919     | 86       | 0.287         | 0.100 | 0.500 |                                |
| chr6 | 29663843            | 29717900  | 54058    | 52       | 0.289         | 0.133 | 0.571 |                                |
| chr6 | 105236702           | 105510891 | 274190   | 62       | 0.295         | 0.100 | 0.800 |                                |
| chr6 | 25859700            | 26064480  | 204781   | 79       | 0.296         | 0.100 | 0.750 |                                |

|       |           |           |         |     |       |       |       |     |
|-------|-----------|-----------|---------|-----|-------|-------|-------|-----|
| chr6  | 67962405  | 68500884  | 538480  | 92  | 0.296 | 0.100 | 0.571 |     |
| chr6  | 34654439  | 35496457  | 842019  | 111 | 0.310 | 0.100 | 0.800 | a   |
| chr6  | 30189168  | 30219842  | 30675   | 58  | 0.312 | 0.143 | 0.546 |     |
| chr6  | 31360904  | 31370848  | 9945    | 69  | 0.316 | 0.107 | 0.546 |     |
| chr6  | 31427260  | 31485026  | 57767   | 207 | 0.323 | 0.107 | 0.546 |     |
| chr6  | 30319734  | 30605469  | 285736  | 473 | 0.324 | 0.100 | 0.750 |     |
| chr6  | 32488186  | 32673883  | 185698  | 330 | 0.324 | 0.100 | 0.750 |     |
| chr6  | 20739524  | 20839503  | 99980   | 68  | 0.328 | 0.100 | 0.636 |     |
| chr6  | 29912144  | 29930933  | 18790   | 68  | 0.342 | 0.167 | 0.571 |     |
| chr6  | 27851529  | 29631936  | 1780408 | 787 | 0.355 | 0.133 | 0.667 | a   |
| chr6  | 142638420 | 142926709 | 288290  | 56  | 0.358 | 0.100 | 0.800 |     |
| chr6  | 14601622  | 14732194  | 130573  | 78  | 0.359 | 0.100 | 0.600 |     |
| chr6  | 32313023  | 32487513  | 174491  | 517 | 0.379 | 0.100 | 0.750 |     |
| chr6  | 31120973  | 31193248  | 72276   | 123 | 0.396 | 0.107 | 0.750 |     |
| chr6  | 32744232  | 32850037  | 105806  | 629 | 0.404 | 0.100 | 0.857 |     |
| chr6  | 33126526  | 33190018  | 63493   | 272 | 0.418 | 0.100 | 0.800 |     |
| chr6  | 126523101 | 127433163 | 910063  | 144 | 0.499 | 0.100 | 0.900 |     |
| chr7  | 53635572  | 54042585  | 407014  | 83  | 0.214 | 0.100 | 0.400 |     |
| chr7  | 46137037  | 46281902  | 144866  | 94  | 0.391 | 0.100 | 0.833 |     |
| chr7  | 8566878   | 8688285   | 121408  | 141 | 0.507 | 0.125 | 0.643 |     |
| chr8  | 17794527  | 17955764  | 161238  | 51  | 0.204 | 0.100 | 0.400 |     |
| chr8  | 31611718  | 31934969  | 323252  | 86  | 0.238 | 0.100 | 0.400 |     |
| chr8  | 52689285  | 53079454  | 390170  | 51  | 0.239 | 0.143 | 0.455 |     |
| chr8  | 51531523  | 51845753  | 314231  | 64  | 0.243 | 0.136 | 0.600 |     |
| chr8  | 59283364  | 59493770  | 210407  | 54  | 0.246 | 0.111 | 0.600 |     |
| chr8  | 73185007  | 73320462  | 135456  | 72  | 0.265 | 0.100 | 0.409 |     |
| chr8  | 10951643  | 11156447  | 204805  | 57  | 0.286 | 0.143 | 0.600 |     |
| chr8  | 19857092  | 19913956  | 56865   | 65  | 0.345 | 0.154 | 0.600 |     |
| chr8  | 120016832 | 120176083 | 159252  | 120 | 0.438 | 0.136 | 0.800 |     |
| chr9  | 22015493  | 22115347  | 99855   | 53  | 0.253 | 0.143 | 0.417 |     |
| chr9  | 22583375  | 22771709  | 188335  | 56  | 0.287 | 0.154 | 0.500 |     |
| chr9  | 107575151 | 107931482 | 356332  | 74  | 0.317 | 0.100 | 0.600 |     |
| chr10 | 14248516  | 14431279  | 182764  | 64  | 0.244 | 0.111 | 0.500 |     |
| chr10 | 55220376  | 55468731  | 248356  | 51  | 0.260 | 0.111 | 0.539 |     |
| chr10 | 84943192  | 85272162  | 328971  | 57  | 0.297 | 0.143 | 0.500 |     |
| chr10 | 64400198  | 65186155  | 785958  | 162 | 0.349 | 0.100 | 0.667 |     |
| chr10 | 44057150  | 44185745  | 128596  | 55  | 0.353 | 0.120 | 0.583 |     |
| chr10 | 35194352  | 35988522  | 794171  | 124 | 0.518 | 0.100 | 0.917 |     |
| chr11 | 106595322 | 106845807 | 250486  | 51  | 0.209 | 0.111 | 0.400 |     |
| chr11 | 29018392  | 29177417  | 159026  | 55  | 0.216 | 0.100 | 0.417 |     |
| chr11 | 116250694 | 116542152 | 291459  | 53  | 0.233 | 0.100 | 0.357 |     |
| chr11 | 41707086  | 42095879  | 388794  | 84  | 0.372 | 0.100 | 0.750 |     |
| chr11 | 77575797  | 78080350  | 504554  | 128 | 0.449 | 0.100 | 0.714 |     |
| chr11 | 77575797  | 77713480  | 137684  | 68  | 0.455 | 0.167 | 0.875 |     |
| chr12 | 39573334  | 39886739  | 313406  | 59  | 0.196 | 0.111 | 0.364 |     |
| chr12 | 40002067  | 40279201  | 277135  | 63  | 0.220 | 0.133 | 0.391 |     |
| chr12 | 87163821  | 87774939  | 611119  | 56  | 0.226 | 0.100 | 0.400 | a,b |
| chr12 | 19096918  | 19434212  | 337295  | 60  | 0.248 | 0.100 | 0.600 |     |
| chr12 | 33228724  | 34171378  | 942655  | 121 | 0.303 | 0.115 | 0.583 |     |
| chr12 | 21065763  | 21383204  | 317442  | 75  | 0.306 | 0.107 | 0.636 |     |
| chr13 | 57170822  | 57633641  | 462820  | 53  | 0.218 | 0.111 | 0.385 |     |
| chr13 | 68760044  | 69065749  | 305706  | 51  | 0.253 | 0.100 | 0.500 |     |
| chr13 | 36891196  | 36967542  | 76347   | 69  | 0.255 | 0.100 | 0.455 |     |
| chr13 | 66975060  | 67272126  | 297067  | 57  | 0.267 | 0.100 | 0.667 |     |
| chr13 | 62484832  | 62802382  | 317551  | 72  | 0.285 | 0.111 | 0.546 |     |
| chr14 | 96309884  | 96589368  | 279485  | 57  | 0.207 | 0.100 | 0.400 |     |
| chr14 | 51509986  | 51613974  | 103989  | 61  | 0.216 | 0.100 | 0.364 |     |
| chr14 | 64316376  | 64631501  | 315126  | 62  | 0.265 | 0.107 | 0.600 |     |
| chr14 | 31062882  | 31453349  | 390468  | 179 | 0.314 | 0.100 | 0.600 |     |
| chr15 | 69866607  | 70850572  | 983966  | 57  | 0.210 | 0.111 | 0.333 | a,b |
| chr15 | 82196974  | 82451260  | 254287  | 74  | 0.245 | 0.107 | 0.500 |     |
| chr15 | 65479620  | 65970648  | 491029  | 63  | 0.245 | 0.143 | 0.364 |     |
| chr15 | 46172722  | 46789618  | 616897  | 120 | 0.489 | 0.100 | 0.875 |     |
| chr16 | 78364890  | 78476415  | 111526  | 51  | 0.241 | 0.100 | 0.462 |     |
| chr17 | 53817782  | 54794191  | 976410  | 88  | 0.287 | 0.100 | 0.600 |     |
| chr18 | 7468995   | 7647610   | 178616  | 56  | 0.229 | 0.111 | 0.400 |     |
| chr18 | 63469632  | 63643786  | 174155  | 66  | 0.266 | 0.111 | 0.417 |     |
| chr20 | 6240392   | 6417596   | 177205  | 81  | 0.306 | 0.100 | 0.833 |     |
| chr20 | 31989031  | 32795422  | 806392  | 67  | 0.312 | 0.100 | 0.636 |     |
| chr20 | 33202915  | 33682910  | 479996  | 76  | 0.330 | 0.130 | 0.571 | a,b |
| chr20 | 21475873  | 22248035  | 772163  | 223 | 0.419 | 0.100 | 1.000 |     |
| chr21 | 28907937  | 30067700  | 1159764 | 200 | 0.288 | 0.107 | 0.667 | a   |

Abbreviations: chr-chromosome; ROH-runs of homozygosity, Pos-position, Min- minimum, Max - maximum  
a- Nothnagel M, Lu TT, Kayser M, Krawczak M: Genomic and geographic distribution of SNP-defined runs of  
homozygosity in Europeans. Hum Mol Genet 2010; 19: 2927-2935.

b-Pemberton TJ, Absher D, Feldman MW, Myers RM, Rosenberg NA, Li JZ: Genomic patterns of homozygosity  
in worldwide human populations. Am J Hum Genet 2012; 91: 275-292.
